# Supplementary material for: High PD-L1 Expression on Tumor Cells Indicates Worse Overall Survival in Advanced Oral Squamous Cell Carcinomas of the Tongue and the Floor of the Mouth but Not in Other Oral Compartments
Source: MDPI journal article supplement (doi:10.3390/biomedicines9091132), 2021-09-01
Supplement: s1 [file s1]

A

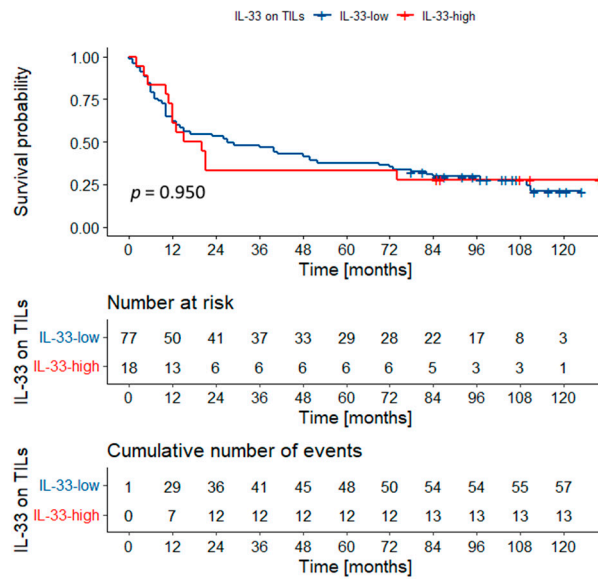

B

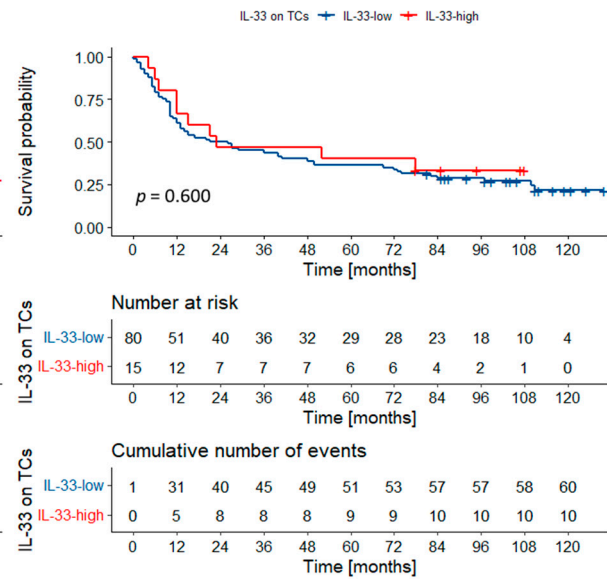

**Supplementary Figure S1.** Overall survival probability curves according to IL-33 expression on TILs (A) and TCs (B) in the whole cohort. Abbreviations: TCs – tumor cells; TILs – tumor infiltrating lymphocytes.

A

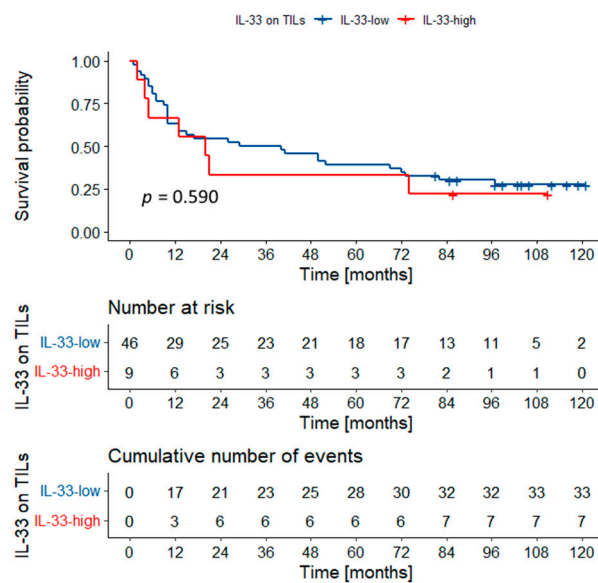

B

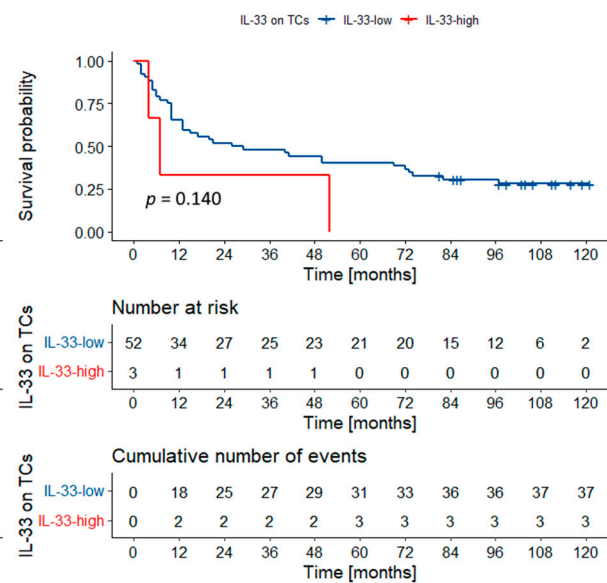

**Supplementary Figure S2.** Overall survival probability curves according to IL-33 expression on TILs (A) and TCs (B) in cancers of the tongue/floor of the oral cavity. Abbreviations: TCs – tumor cells; TILs – tumor infiltrating lymphocytes.

A

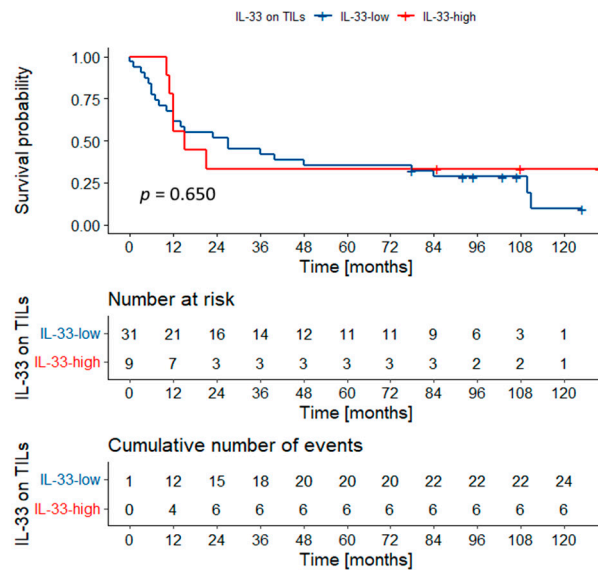

B

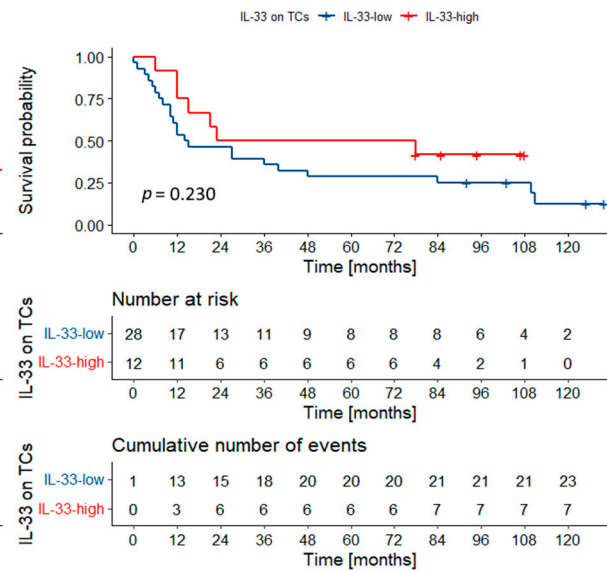

**Supplementary Figure S3.** Overall survival probability curves according to IL-33 expression on TILs (A) and TCs (B) in cancers of other oral compartments. Abbreviations: TCs – tumor cells; TILs – tumor infiltrating lymphocytes.
