# Supplementary material for: High PD-L1 Expression on Tumor Cells Indicates Worse Overall Survival in Advanced Oral Squamous Cell Carcinomas of the Tongue and the Floor of the Mouth but Not in Other Oral Compartments
Source: MDPI journal article supplement (doi:10.3390/biomedicines9091132), 2021-09-01
Supplement: s1 [file s1]

**Supplementary Table S1.** The summary of clinicopathological features with relation to IL-33 expression on TCs and TILs ( $p$  –  $p$  value; \* – statistically significant  $p$ ).

| Parameters                             | Case number n (%) | IL-33 on TCs |            |          | IL-33 on TILs |            |          |
|----------------------------------------|-------------------|--------------|------------|----------|---------------|------------|----------|
|                                        |                   | Low n (%)    | High n (%) | <i>p</i> | Low n (%)     | High n (%) | <i>p</i> |
| Gender                                 |                   |              |            |          |               |            |          |
| Female                                 | 32 (33.68)        | 29 (30.53)   | 3 (3.16)   | 0.222    | 28 (29.47)    | 4 (4.21)   | 0.253    |
| Male                                   | 63 (66.32)        | 51 (53.68)   | 12 (12.63) |          | 48 (50.52)    | 14 (14.74) |          |
| Smoking                                |                   |              |            |          |               |            |          |
| No                                     | 22 (30.14)        | 16 (21.92)   | 6 (8.22)   | 0.165    | 16 (21.92)    | 6 (8.22)   | 0.467    |
| Yes                                    | 51 (69.86)        | 44 (60.27)   | 7 (9.59)   |          | 41 (56.16)    | 10 (13.70) |          |
| Alcohol                                |                   |              |            |          |               |            |          |
| No                                     | 58 (80.56)        | 49 (68.06)   | 9 (12.05)  | 0.594    | 47 (65.28)    | 11 (15.28) | 0.427    |
| Yes                                    | 14 (19.44)        | 9 (12.05)    | 3 (4.17)   |          | 10 (13.89)    | 4 (5.56)   |          |
| Grade                                  |                   |              |            |          |               |            |          |
| 1                                      | 39 (42.05)        | 35 (36.84)   | 4 (4.21)   | 0.217    | 34 (35.79)    | 5 (5.26)   | 0.203    |
| 2-3                                    | 56 (58.95)        | 45 (47.37)   | 11 (11.58) |          | 43 (45.26)    | 13 (13.68) |          |
| Stage                                  |                   |              |            |          |               |            |          |
| I-II                                   | 32 (42.67)        | 30 (38.96)   | 2 (2.60)   | 0.057    | 27 (35.06)    | 5 (6.49)   | 0.803    |
| III-IV                                 | 45 (57.33)        | 35 (45.45)   | 10 (12.99) |          | 37 (48.05)    | 8 (10.39)  |          |
| T                                      |                   |              |            |          |               |            |          |
| 1-2                                    | 42 (55.26)        | 37 (48.68)   | 5 (6.58)   | 0.302    | 34 (44.74)    | 8 (10.53)  | 0.617    |
| 3-4                                    | 34 (44.74)        | 27 (35.53)   | 7 (9.21)   |          | 29 (38.16)    | 5 (6.58)   |          |
| N                                      |                   |              |            |          |               |            |          |
| 0                                      | 39 (52.70)        | 39 (52.70)   | 4 (5.41)   | 0.142    | 32 (43.24)    | 7 (9.46)   | 0.927    |
| 1-3                                    | 35 (47.30)        | 35 (47.30)   | 8 (10.81)  |          | 29 (39.19)    | 6 (8.11)   |          |
| Location                               |                   |              |            |          |               |            |          |
| Tongue/<br>Floor of the<br>oral cavity | 55 (57.89)        | 52 (54.74)   | 3 (3.16)   | 0.001 *  | 46 (48.42)    | 9 (9.47)   | 0.451    |
| Other                                  | 40 (42.11)        | 28 (29.47)   | 12 (12.63) |          | 31 (32.63)    | 9 (9.47)   |          |

**Supplementary Table S2.** The summary of studies investigating immunohistochemical expression of PD-L1 in OSCC. Abbreviations: (TCs – tumor cells, TILs – tumor infiltrating lymphocytes, NE – not examined, NS – not significant, NA – not available, OS – overall survival, PP – poor prognosis, DSS – disease-specific survival, DSD – disease-specific death; DFS – disease-free survival, PFS – progression-free survival, RFS – recurrence-free survival).

| No | Reference                            | Clone          | Number of cases | IHC staining assessment methods                       | Assessment of PD-L1 expression in tumor cells | Number of positive cases – n (%)     | Assessment of PD-L1 expression in immune cells | n (%)       | Localization assessment | Other findings                                                                  | Prognostic significance                                                  |
|----|--------------------------------------|----------------|-----------------|-------------------------------------------------------|-----------------------------------------------|--------------------------------------|------------------------------------------------|-------------|-------------------------|---------------------------------------------------------------------------------|--------------------------------------------------------------------------|
| 1  | Lequerica-Fernández et al. 2021 [33] | 22C3 and E1L3N | 125             | Percentage of positive cells (cut-off >10%)           | Yes                                           | 18 (14.4) – 22C3<br>12 (9.7) - E1L3N | No                                             | -           | Yes (NS)                | High PD-L1 expression was associated with a high tumoral CD8+/FOXP3+ TILs ratio | High PD-L1 expression on TCs associated with poor DSS                    |
| 2  | Cui et al. 2020 [34]                 | E1L3N          | 34              | H-score                                               | Yes                                           | NA                                   | No                                             | -           | NE                      | PKD3 regulates the expression of PD-L1 triggered by IFN- $\gamma$               | NE                                                                       |
| 3  | Meehan et al. 2020 [35]              | 22C3 SP263     | 67              | Percentage of positive cells (tumor proportion score) | Yes                                           | NA                                   | No                                             | -           | Only tongue             | Recurrent tumors were characterized by higher PD-L1 expression on TCs           | NE                                                                       |
| 4  | Quan et al. 2020 [36]                | E1L3N          | 159             | Density of cells                                      | No                                            | NA                                   | Yes                                            | -           | NE                      | Higher density of PD-L1-positive TILs in larger tumors                          | NS                                                                       |
| 5  | Wilms et al. 2020 [37]               | SP263          | 101             | Quick score (ranging 0-18)                            | Yes                                           | 80 (79.2)                            | Yes                                            | 117 (96.7%) | Only tongue             | Association with gender                                                         | Low PD-L1 expression on TCs associated with longer OS and DSS in females |
| 6  | Zhao et al. 2020 [38]                | 28-8           | 46              | Percentage of positive cells (cut-off > 50%)          | Yes                                           | 30 (65.2)                            | No                                             | -           | Only tongue             | High PD-L1 on TCs associated with nodal metastases and higher stage             | NE                                                                       |
| 7  | Ahmadi et al. 2019 [39]              | E1L3N          | 255             | Percentage of positive cells (cut-off > 1%)           | Yes                                           | 70 (27.5)                            | No                                             | -           | No                      | Association with gender, smoking, and p53 expression                            | TCs: OS – NS<br>DSS – NS<br>DFS – NS                                     |
| 8  | de Vincente et al. 2019 [40]         | E1L3N          | 125             | Percentage of positive TCs cut-off 1%                 | Yes                                           | 4 (3.2)                              | No                                             | -           | Yes                     | NS                                                                              | TCs: DFS – S                                                             |

| No | Reference                                | Clone                 | Number of cases | IHC staining assessment methods                                    | Assessment of PD-L1 expression in tumor cells | Number of positive cases – n (%) | Assessment of PD-L1 expression in immune cells | n (%)      | Localization assessment | Other findings                                                         | Prognostic significance                              |
|----|------------------------------------------|-----------------------|-----------------|--------------------------------------------------------------------|-----------------------------------------------|----------------------------------|------------------------------------------------|------------|-------------------------|------------------------------------------------------------------------|------------------------------------------------------|
| 9  | Kouketsu et al. 2019 [41]                | SP142                 | 106             | Semiquantitative evaluation                                        | Yes                                           | 73 (68.9)                        | No                                             | -          | No                      | Association with stage                                                 | TCs: NS                                              |
| 10 | Takahashi et al. 2019 [42]               | E1L3N                 | 77              | Percentage of positive cells (cut-off > 10%)                       | Yes                                           | 46 (60)                          | No                                             | -          | No                      | NS                                                                     | TCs: OS – NS                                         |
| 11 | Tojyo et al. 2019 [43]                   | SP263                 | 49              | Percentage of positive cells (cut-off ≥ 5% of TCs and ≥1% of TILs) | Yes                                           | 24 (48.9)                        | Yes                                            | 28 (57.1%) | No                      | PD-L1 expression on TCs correlated with p53 expression                 | TCs, TILs: DSS – NS                                  |
| 12 | Hanna et al. 2018 [44]                   | 9A11                  | 81 (23 females) | Percentage of positive cells (cut-off ≥ 10%)                       | Yes                                           | 20/23 females (86.9)             | Yes                                            | 0 (0%)     | No                      | NS                                                                     | TCs: low PD-L1 associated with worse OS in females   |
| 13 | Maruse et al. 2018 [45]                  | E1L3N                 | 97              | Percentage of positive cells (cut-off ≥ 5%)                        | Yes                                           | 63 (64.9)                        | No                                             | -          | NE                      | PD-L1 expression associated with nodal and distant metastases          | TCs: high PD-L1 expression associated with worse DSS |
| 14 | Stasikowska-Kanicka et al. 2018 (1) [46] | 28-8                  | 78              | Semiquantitative evaluation                                        | Yes                                           | 62 (79)                          | Detected                                       | NA         | NE                      | -                                                                      | TCs: higher PD-L1 expression in poor prognosis group |
| 15 | Stasikowska-Kanicka (2) et al. 2018 [47] | 28-8                  | 70              | Semiquantitative evaluation                                        | Yes                                           | 67 (96)                          | Yes                                            | 13         | NE                      | NE                                                                     | NE                                                   |
| 16 | Udeabor et al. 2018 [48]                 | 28-8                  | 20              | Semiquantitative evaluation                                        | Yes                                           | NA                               | Yes                                            | No data    | NE                      | NE                                                                     | NE                                                   |
| 17 | Wirsing et al. 2018 [49]                 | SP263                 | 45              | Percentage of positive cells (cut-off ≥ 10%)                       | Yes                                           | 18 (40)                          | Detected                                       | NA         | NE                      | PD-L1 expression association with tumor size and density of CD4+ cells | TCs: DSS – NS                                        |
| 18 | Ahn et al. 2017 [50]                     | ab153991 (polyclonal) | 68              | Semiquantitative evaluation                                        | Yes                                           | 45 (66.2)                        | No                                             | -          | NE                      | Prognostic significance of PD-L1 was dependent on the                  | TCs: high PD-L1 ex-                                  |

| No | Reference                  | Clone          | Number of cases | IHC staining assessment methods                                                        | Assessment of PD-L1 expression in tumor cells | Number of positive cases – n (%)    | Assessment of PD-L1 expression in immune cells | n (%)      | Localization assessment | Other findings                                                                                     | Prognostic significance                                                                  |
|----|----------------------------|----------------|-----------------|----------------------------------------------------------------------------------------|-----------------------------------------------|-------------------------------------|------------------------------------------------|------------|-------------------------|----------------------------------------------------------------------------------------------------|------------------------------------------------------------------------------------------|
|    |                            |                |                 |                                                                                        |                                               |                                     |                                                |            |                         | levels of miR-197                                                                                  | pression associated with better OS                                                       |
| 19 | Feng et al. 2017 [51]      | E1L3N          | 119             | Semiquantitative evaluation                                                            | Yes                                           | NA                                  | Yes                                            | NA         | NE                      | -                                                                                                  | A high number of PD-L1-positive cells in the vicinity of CD8+ T-cells indicates worse OS |
| 20 | Foy et al. 2017 [52]       | SP142 and 28.8 | 44              | Percentage of positive cells (various cut-offs $\geq 1$ , $\geq 5$ , and $\geq 10\%$ ) | Yes                                           | Dependent on antibody and threshold | Detected                                       | NA         | NE                      | Higher PD-L1 expression in TCs in never-smokers and never-drinkers                                 | NE                                                                                       |
| 21 | Groeger et al. 2017 [53]   | MIH1           | 15              | No data                                                                                | Yes                                           | 15 (100)                            | No                                             | -          | NE                      | NE                                                                                                 | NE                                                                                       |
| 22 | Hirai et al. 2017 [54]     | NA             | 24              | Semiquantitative evaluation                                                            | Yes                                           | NA                                  | Detected                                       | NA         | NE                      | Association with mode of invasion                                                                  | NE                                                                                       |
| 23 | Kogashiwa et al. 2017 [55] | SP142          | 84              | Percentage of positive cells (cut-off $\geq 5\%$ )                                     | Yes                                           | 44 (52.4)                           | Yes                                            | NA         | NE                      | Unclear if expression was evaluated in TCs only or combined in TCs and TILs                        | High PD-L1 expression associated with better PFS and OS                                  |
| 24 | Kubota et al. 2017 [56]    | E1L3N          | 46              | NA                                                                                     | No                                            | NA                                  | Yes                                            | -          | NE                      | CD163+CD204+ macrophages promote T-cell apoptosis and immunosuppression <i>via</i> IL-10 and PD-L1 | NE                                                                                       |
| 25 | Mattox et al. 2017 [57]    | 5H1            | 53              | Percentage of positive TCs and/or TILs (cut-off 1%)                                    | Yes                                           | 42 (79.2)                           | Yes                                            | 35 (83.3%) | Only tongue             | CD4+PD-1+ and CD8+PD-1+ TILs were functionally                                                     | OS – NS                                                                                  |

| No | Reference                      | Clone | Number of cases                                            | IHC staining assessment methods                                           | Assessment of PD-L1 expression in tumor cells | Number of positive cases – n (%) | Assessment of PD-L1 expression in immune cells | n (%) | Localization assessment                                                                                                    | Other findings                                                                                  | Prognostic significance              |
|----|--------------------------------|-------|------------------------------------------------------------|---------------------------------------------------------------------------|-----------------------------------------------|----------------------------------|------------------------------------------------|-------|----------------------------------------------------------------------------------------------------------------------------|-------------------------------------------------------------------------------------------------|--------------------------------------|
|    |                                |       |                                                            |                                                                           |                                               |                                  |                                                |       |                                                                                                                            | anergic in the presence of PD-L1+ macrophages                                                   |                                      |
| 26 | Takakura et al. 2017 [58]      | 27A2  | 10 chemo-naïve tumors + 8 tumors treated with chemotherapy | Percentage of positive cells (cut-off 25%)                                | Yes                                           | 8 (80)<br>2 (25)                 | No                                             | -     | NE                                                                                                                         | OSCCs treated with neoadjuvant chemotherapy have lower PD-L1 expression than chemo-naïve tumors | NE                                   |
| 27 | Troeltzsch et al. 2017 [59]    | E1L3N | 88                                                         | Percentage of positive cells (cut-off 5%)                                 | Yes                                           | 26 (29.5)                        | No                                             | -     | Yes, PD-L1 expression was more common in mandibular localisation and tongue than in maxilla and palate                     | High PD-L1 expression associated with nodal metastases                                          | TCs: DSD – NS                        |
| 28 | Satgunaseelan et al. 2016 [60] | E1L3N | 217                                                        | Percentage of positive cells (cut-off 5%) and semiquantitative evaluation | Yes                                           | 40 (18.4)                        | No                                             | -     | Yes, PD-L1 expression was more frequent in the buccal mucosa and the tongue compared to the gingiva and the floor of mouth | Association with gender                                                                         | TCs: DSS – NS<br>DFS – NS<br>OS – NS |

| No | Reference                       | Clone                   | Number of cases | IHC staining assessment methods            | Assessment of PD-L1 expression in tumor cells | Number of positive cases – n (%) | Assessment of PD-L1 expression in immune cells | n (%) | Localization assessment | Other findings                                               | Prognostic significance                                                        |
|----|---------------------------------|-------------------------|-----------------|--------------------------------------------|-----------------------------------------------|----------------------------------|------------------------------------------------|-------|-------------------------|--------------------------------------------------------------|--------------------------------------------------------------------------------|
| 29 | Straub et al. 2016 [61]         | E1L3N                   | 80              | Percentage of positive cells (cut-off 5%). | Yes                                           | 36 (45)                          | No                                             | -     | NE                      | NS with clinicopathological findings                         | TCs: High PD-L1 expression associated with worse OS and RFS                    |
| 30 | Chen et al. 2015 [62]           | 2B11D11                 | 218             | Percentage of positive cells (cut-off 5%). | Yes                                           | 139 (63.8)                       | No                                             | -     | NE                      | PD-L1 expression assessed also in metastatic lymph nodes     | TCs: high PD-L1 expression and tumor necrosis associated with worse DFS and OS |
| 31 | Lin et al. 2015 [63]            | GTX1047 63 (polyclonal) | 305             | Intensity of staining                      | Yes                                           | 134 (43.9)                       | No                                             | -     | NE                      | Association with gender                                      | TCs: High PD-L1 expression associated with worse OS in male smokers            |
| 32 | Oliveira-Costa et al. 2015 [64] | ab28753 (polyclonal)    | 97              | Percentage of positive cells (cut-off 5%)  | Yes                                           | 47 (48.4)                        | No                                             | -     | Yes, NS                 | Circulating tumor cells from selected patients express PD-L1 | TCs: High cytoplasmatic expression of PD-L1 associated with better OS          |
| 33 | Cho et al. 2011 [65]            | ab82059                 | 45              | Semiquantitative evaluation                | Yes                                           | 39 (86.7)                        | No                                             | -     | NE                      | Association with grade and density of CD8+ TILs              | TCs: OS – NS                                                                   |
| 34 | Malaspina et al. 2011 [66]      | MIH1                    | 39              | No data                                    | Yes                                           | NA                               | No                                             | -     | NE                      | NE                                                           | NE                                                                             |
